# Supplementary material for: Slumber in a cell: honeycomb used by honey bees for food, brood, heating… and sleeping
Source: PeerJ. 2020 Aug 5;8:e9583. doi: 10.7717/peerj.9583 (PMC7414769; doi:10.7717/peerj.9583)
Supplement: Supplemental Information 16 — This column is necessary for executing the statistics script related to the behavior surveys, which needs the totals in long format to conduct a Kruskal–Wallis test. [file peerj-08-9583-s016.csv]

year	month	date	day.night	time	behavior	proportion	total	abdomen dv.count	b.filler	cleaner.count	feeder.count	heater.count	total.beh	Time Gap Between Censuses
2008	8	22	day	13:33	cleaner	0.5	4	2	13	2	0	0	2
2008	8	22	day	13:33	abdomen dv	0.5	4						2
2008	8	22	day	13:33	heater	0	4						0
2008	8	22	day	13:33	feeder	0	4						0
2008	8	22	day	13:49	cleaner	0.3333333	6	2	11	2	0	2	2	0:16
2008	8	22	day	13:49	abdomen dv	0.3333333	6						2
2008	8	22	day	13:49	heater	0.3333333	6						2
2008	8	22	day	13:49	feeder	0	6						0
2008	8	22	day	14:01	cleaner	0.8333333	6	1	11	5	0	0	5	0:12
2008	8	22	day	14:01	abdomen dv	0.1666667	6						1
2008	8	22	day	14:01	heater	0	6						0
2008	8	22	day	14:01	feeder	0	6						0
2008	8	22	day	14:23	cleaner	0.9	10	1	7	9	0	0	9	0:22
2008	8	22	day	14:23	abdomen dv	0.1	10						1
2008	8	22	day	14:23	heater	0	10						0
2008	8	22	day	14:23	feeder	0	10						0
2008	8	22	day	14:52	cleaner	1	8	0	9	8	0	0	8	0:29
2008	8	22	day	14:52	abdomen dv	0	8						0
2008	8	22	day	14:52	heater	0	8						0
2008	8	22	day	14:52	feeder	0	8						0
2008	8	22	day	15:09	cleaner	0.7142857	7	0	10	5	0	2	5	0:17
2008	8	22	day	15:09	abdomen dv	0	7						0
2008	8	22	day	15:09	heater	0.2857143	7						2
2008	8	22	day	15:09	feeder	0	7						0
2008	8	22	day	15:42	cleaner	0.8333333	6	0	11	5	0	1	5	0:33
2008	8	22	day	15:42	abdomen dv	0	6						0
2008	8	22	day	15:42	heater	0.1666667	6						1
2008	8	22	day	15:42	feeder	0	6						0
2008	8	22	day	16:04	cleaner	0.7272727	11	2	6	8	0	1	8	0:22
2008	8	22	day	16:04	abdomen dv	0.1818182	11						2
2008	8	22	day	16:04	heater	0.0909091	11						1
2008	8	22	day	16:04	feeder	0	11						0
2008	8	22	day	16:29	cleaner	0.6923077	13	3	4	9	0	1	9	0:25
2008	8	22	day	16:29	abdomen dv	0.2307692	13						3
2008	8	22	day	16:29	heater	0.0769231	13						1
2008	8	22	day	16:29	feeder	0	13						0
2008	8	22	day	16:43	cleaner	0.875	8	0	9	7	0	1	7	0:14
2008	8	22	day	16:43	abdomen dv	0	8						0
2008	8	22	day	16:43	heater	0.125	8						1
2008	8	22	day	16:43	feeder	0	8						0
2008	8	22	day	17:02	cleaner	0.8181818	11	1	6	9	0	1	9	0:19
2008	8	22	day	17:02	abdomen dv	0.0909091	11						1
2008	8	22	day	17:02	heater	0.0909091	11						1
2008	8	22	day	17:02	feeder	0	11						0
2008	8	22	day	19:20	cleaner	0.5	6	2	11	3	0	1	3	2:18
2008	8	22	day	19:20	abdomen dv	0.3333333	6						2
2008	8	22	day	19:20	heater	0.1666667	6						1
2008	8	22	day	19:20	feeder	0	6						0
2008	8	22	day	19:33	cleaner	0.5	6	2	11	3	0	1	3	0:13
2008	8	22	day	19:33	abdomen dv	0.3333333	6						2
2008	8	22	day	19:33	heater	0.1666667	6						1
2008	8	22	day	19:33	feeder	0	6						0
2008	8	22	day	19:45	cleaner	0.5454545	11	4	6	6	0	1	6	0:12
2008	8	22	day	19:45	abdomen dv	0.3636364	11						4
2008	8	22	day	19:45	heater	0.0909091	11						1
2008	8	22	day	19:45	feeder	0	11						0
2008	8	22	night	20:05	cleaner	0.6	15	3	2	9	1	2	9	0:20
2008	8	22	night	20:05	abdomen dv	0.2	15						3
2008	8	22	night	20:05	heater	0.1333333	15						2
2008	8	22	night	20:05	feeder	0.0666667	15						1
2008	8	22	night	20:20	cleaner	1	10	0	7	10	0	0	10	0:15
2008	8	22	night	20:20	abdomen dv	0	10						0
2008	8	22	night	20:20	heater	0	10						0
2008	8	22	night	20:20	feeder	0	10						0
2008	8	22	night	22:12	cleaner	0.8333333	6	0	11	5	0	1	5	1:52
2008	8	22	night	22:12	abdomen dv	0	6						0
2008	8	22	night	22:12	heater	0.1666667	6						1
2008	8	22	night	22:12	feeder	0	6						0
2008	8	22	night	22:31	cleaner	0.5	8	3	9	4	0	1	4	0:19
2008	8	22	night	22:31	abdomen dv	0.375	8						3
2008	8	22	night	22:31	heater	0.125	8						1
2008	8	22	night	22:31	feeder	0	8						0
2008	8	22	night	22:48	cleaner	0.6153846	13	3	4	8	0	2	8	0:17
2008	8	22	night	22:48	abdomen dv	0.2307692	13						3
2008	8	22	night	22:48	heater	0.1538462	13						2
2008	8	22	night	22:48	feeder	0	13						0
2008	8	22	night	22:59	cleaner	0.7272727	11	2	6	8	0	1	8	0:11
2008	8	22	night	22:59	abdomen dv	0.1818182	11						2
2008	8	22	night	22:59	heater	0.0909091	11						1
2008	8	22	night	22:59	feeder	0	11						0
2008	8	22	night	23:27	cleaner	0.5	6	3	11	3	0	0	3	0:28
2008	8	22	night	23:27	abdomen dv	0.5	6						3
2008	8	22	night	23:27	heater	0	6						0
2008	8	22	night	23:27	feeder	0	6						0
2008	8	22	night	23:42	cleaner	0.5833333	12	4	5	7	0	1	7	0:15
2008	8	22	night	23:42	abdomen dv	0.3333333	12						4
2008	8	22	night	23:42	heater	0.0833333	12						1
2008	8	22	night	23:42	feeder	0	12						0
2008	8	23	night	0:10	cleaner	0.7692308	13	1	4	10	0	2	10	0:28
2008	8	23	night	0:10	abdomen dv	0.0769231	13						1
2008	8	23	night	0:10	heater	0.1538462	13						2
2008	8	23	night	0:10	feeder	0	13						0
2008	8	23	night	0:23	cleaner	0.9230769	13	1	4	12	0	0	12	0:13
2008	8	23	night	0:23	abdomen dv	0.0769231	13						1
2008	8	23	night	0:23	heater	0	13						0
2008	8	23	night	0:23	feeder	0	13						0
2008	8	23	night	1:57	cleaner	0.9375	16	1	1	15	0	0	15	1:34
2008	8	23	night	1:57	abdomen dv	0.0625	16						1
2008	8	23	night	1:57	heater	0	16						0
2008	8	23	night	1:57	feeder	0	16						0
2008	8	23	night	2:07	cleaner	0.7692308	13	1	4	10	0	2	10	0:10
2008	8	23	night	2:07	abdomen dv	0.0769231	13						1
2008	8	23	night	2:07	heater	0.1538462	13						2
2008	8	23	night	2:07	feeder	0	13						0
2008	8	23	night	4:15	cleaner	1	5	0	12	5	0	0	5	2:08
2008	8	23	night	4:15	abdomen dv	0	5						0
2008	8	23	night	4:15	heater	0	5						0
2008	8	23	night	4:15	feeder	0	5						0
2008	8	23	night	4:31	cleaner	0.8235294	17	2	0	14	0	1	14	0:16
2008	8	23	night	4:31	abdomen dv	0.1176471	17						2
2008	8	23	night	4:31	heater	0.0588235	17						1
2008	8	23	night	4:31	feeder	0	17						0
2008	8	23	night	5:02	cleaner	0.7777778	9	1	8	7	0	1	7	0:31
2008	8	23	night	5:02	abdomen dv	0.1111111	9						1
2008	8	23	night	5:02	heater	0.1111111	9						1
2008	8	23	night	5:02	feeder	0	9						0
2008	8	23	day	12:43	cleaner	0.3333333	3	2	14	1	0	0	1	7:41
2008	8	23	day	12:43	abdomen dv	0.6666667	3						2
2008	8	23	day	12:43	heater	0	3						0
2008	8	23	day	12:43	feeder	0	3						0
2008	8	23	day	18:50	cleaner	0.6	5	1	12	3	0	1	3	6:07
2008	8	23	day	18:50	abdomen dv	0.2	5						1
2008	8	23	day	18:50	heater	0.2	5						1
2008	8	23	day	18:50	feeder	0	5						0
2008	8	23	day	19:04	cleaner	0.8333333	12	2	5	10	0	0	10	0:14
2008	8	23	day	19:04	abdomen dv	0.1666667	12						2
2008	8	23	day	19:04	heater	0	12						0
2008	8	23	day	19:04	feeder	0	12						0
2008	8	23	day	19:18	cleaner	1	8	0	9	8	0	0	8	0:14
2008	8	23	day	19:18	abdomen dv	0	8						0
2008	8	23	day	19:18	heater	0	8						0
2008	8	23	day	19:18	feeder	0	8						0
2008	8	23	day	19:38	cleaner	0.8888889	9	1	8	8	0	0	8	0:20
2008	8	23	day	19:38	abdomen dv	0.1111111	9						1
2008	8	23	day	19:38	heater	0	9						0
2008	8	23	day	19:38	feeder	0	9						0
2008	8	23	night	20:30	cleaner	0.9	10	1	7	9	0	0	9	0:52
2008	8	23	night	20:30	abdomen dv	0.1	10						1
2008	8	23	night	20:30	heater	0	10						0
2008	8	23	night	20:30	feeder	0	10						0
2008	8	23	night	20:42	cleaner	0.9090909	11	1	6	10	0	0	10	0:12
2008	8	23	night	20:42	abdomen dv	0.0909091	11						1
2008	8	23	night	20:42	heater	0	11						0
2008	8	23	night	20:42	feeder	0	11						0
2008	8	23	night	20:56	cleaner	0.9375	16	1	1	15	0	0	15	0:14
2008	8	23	night	20:56	abdomen dv	0.0625	16						1
2008	8	23	night	20:56	heater	0	16						0
2008	8	23	night	20:56	feeder	0	16						0
2008	8	23	night	21:11	cleaner	1	10	0	7	10	0	0	10	0:15
2008	8	23	night	21:11	abdomen dv	0	10						0
2008	8	23	night	21:11	heater	0	10						0
2008	8	23	night	21:11	feeder	0	10						0
2008	8	23	night	23:23	cleaner	0.875	8	1	9	7	0	0	7	2:12
2008	8	23	night	23:23	abdomen dv	0.125	8						1
2008	8	23	night	23:23	heater	0	8						0
2008	8	23	night	23:23	feeder	0	8						0
2008	8	23	night	23:43	cleaner	0.8888889	9	1	8	8	0	0	8	0:20
2008	8	23	night	23:43	abdomen dv	0.1111111	9						1
2008	8	23	night	23:43	heater	0	9						0
2008	8	23	night	23:43	feeder	0	9						0		17
2008	8	24	night	0:19	cleaner	0	1	1	16	0	0	0	0	0:36	36
2008	8	24	night	0:19	abdomen dv	1	1						1
2008	8	24	night	0:19	heater	0	1						0
2008	8	24	night	0:19	feeder	0	1						0
2008	8	24	night	0:52	cleaner	0.8888889	9	1	8	8	0	0	8	0:33
2008	8	24	night	0:52	abdomen dv	0.1111111	9						1
2008	8	24	night	0:52	heater	0	9						0
2008	8	24	night	0:52	feeder	0	9						0
2008	8	24	night	1:26	cleaner	0.875	8	0	9	7	1	0	7	0:34
2008	8	24	night	1:26	abdomen dv	0	8						0
2008	8	24	night	1:26	heater	0	8						0
2008	8	24	night	1:26	feeder	0.125	8						1
2008	8	24	day	10:38	cleaner	1	10	0	7	10	0	0	10	9:12
2008	8	24	day	10:38	abdomen dv	0	10						0
2008	8	24	day	10:38	heater	0	10						0
2008	8	24	day	10:38	feeder	0	10						0
2008	8	24	day	11:08	cleaner	0.9	10	1	7	9	0	0	9	0:30
2008	8	24	day	11:08	abdomen dv	0.1	10						1
2008	8	24	day	11:08	heater	0	10						0
2008	8	24	day	11:08	feeder	0	10						0
2008	8	24	day	11:23	cleaner	0.875	8	1	9	7	0	0	7	0:15
2008	8	24	day	11:23	abdomen dv	0.125	8						1
2008	8	24	day	11:23	heater	0	8						0
2008	8	24	day	11:23	feeder	0	8						0
2008	8	24	day	11:49	cleaner	0.875	8	1	9	7	0	0	7	0:26
2008	8	24	day	11:49	abdomen dv	0.125	8						1
2008	8	24	day	11:49	heater	0	8						0
2008	8	24	day	11:49	feeder	0	8						0
2008	8	24	day	12:33	cleaner	1	10	0	7	10	0	0	10	0:44
2008	8	24	day	12:33	abdomen dv	0	10						0
2008	8	24	day	12:33	heater	0	10						0
2008	8	24	day	12:33	feeder	0	10						0
2008	8	24	day	12:58	cleaner	0.7	10	2	7	7	0	1	7	0:25
2008	8	24	day	12:58	abdomen dv	0.2	10						2
2008	8	24	day	12:58	heater	0.1	10						1
2008	8	24	day	12:58	feeder	0	10						0
													Mean gap:	0:59
													SD gap:	0.077120228
													Min gap:	0:10
													Max gap:	9:12
