# Supplementary material for: Slumber in a cell: honeycomb used by honey bees for food, brood, heating… and sleeping
Source: PeerJ. 2020 Aug 5;8:e9583. doi: 10.7717/peerj.9583 (PMC7414769; doi:10.7717/peerj.9583)
Supplement: Supplemental Information 19 — The giftwrap used as the observation hive’s window produced a nonlinear error when recording temperature as temperature increased, so we adjusted absolute temperature measurements. Adjusted temperatures are listed here. Data were collected by Christian Lutsch. [file peerj-08-9583-s019.csv]

Values (temperature, degrees Celsius)	Increase by:	Corrected values
26.5	0	26.5
26.6	0.05	26.65
26.7	0.1	26.8
26.8	0.18	26.98
26.9	0.23	27.13
27	0.3	27.3
27.1	0.3	27.4
27.2	0.32	27.52
27.3	0.33	27.63
27.4	0.34	27.74
27.5	0.36	27.86
27.6	0.37	27.97
27.7	0.37	28.07
27.8	0.38	28.18
27.9	0.39	28.29
28	0.4	28.4
28.1	0.41	28.51
28.2	0.42	28.62
28.3	0.43	28.73
28.4	0.44	28.84
28.5	0.45	28.95
28.6	0.46	29.06
28.7	0.47	29.17
28.8	0.48	29.28
28.9	0.49	29.39
29	0.5	29.5
29.1	0.5	29.6
29.2	0.52	29.72
29.3	0.54	29.84
29.4	0.56	29.96
29.5	0.57	30.07
29.6	0.58	30.18
29.7	0.6	30.3
29.8	0.62	30.42
29.9	0.64	30.54
30	0.65	30.65
30.1	0.66	30.76
30.2	0.68	30.88
30.3	0.7	31
30.4	0.73	31.13
30.5	0.75	31.25
30.6	0.77	31.37
30.7	0.8	31.5
30.8	0.83	31.63
30.9	0.85	31.75
31	0.87	31.87
31.1	0.9	32
31.2	0.91	32.11
31.3	0.92	32.22
31.4	0.93	32.33
31.5	0.94	32.44
31.6	0.95	32.55
31.7	0.96	32.66
31.8	0.97	32.77
31.9	0.98	32.88
32	0.99	32.99
32.1	1	33.1
32.2	1.04	33.24
32.3	1.08	33.38
32.4	1.12	33.52
32.5	1.16	33.66
32.6	1.2	33.8
32.7	1.24	33.94
32.8	1.28	34.08
32.9	1.32	34.22
33	1.36	34.36
33.1	1.4	34.5
33.2	1.4	34.6
33.3	1.4	34.7
33.4	1.4	34.8
33.5	1.4	34.9
33.6	1.4	35
33.7	1.4	35.1
33.8	1.4	35.2
33.9	1.4	35.3
34	1.4	35.4
34.1	1.4	35.5
34.2	1.4	35.6
34.3	1.41	35.71
34.4	1.42	35.82
34.5	1.43	35.93
34.6	1.44	36.04
34.7	1.45	36.15
34.8	1.46	36.26
34.9	1.47	36.37
35	1.48	36.48
35.1	1.5	36.6
35.2	1.52	36.72
35.3	1.54	36.84
35.4	1.56	36.96
35.5	1.58	37.08
35.6	1.6	37.2
35.7	1.62	37.32
35.8	1.64	37.44
35.9	1.66	37.56
36	1.68	37.68
36.1	1.7	37.8
36.2	1.72	37.92
36.3	1.74	38.04
36.4	1.76	38.16
36.5	1.78	38.28
36.6	1.8	38.4
36.7	1.82	38.52
36.8	1.84	38.64
36.9	1.86	38.76
37	1.88	38.88
37.1	1.9	39
38	2	40
39	2.3	41.3
40	2.3	42.3
41.1	2.5	43.6
